# Supplementary material
Source: ML conference proceedings conference paper supplement (https://openreview.net/forum?id=6r4xHv3bbe)
Supplement: supplementary_material [file attachment]

# Supplementary Materials: Self-Supervised Visual Preference Alignment

Anonymous Authors

## A RELATIONS WITH CONTRASTIVE LEARNING

As discussed before in Sec. 3.3 of the main paper, the optimized function in SeVa has strong relations with visual contrastive learning. In this section, we will derive a more general form of DPO loss that can be easily adapted to our SeVa pipeline. We first rewrite the InfoNCE loss here for clarity:

$$\mathcal{L}_{\text{in}} = -\log \frac{\exp(q \cdot k_+/\tau)}{\exp(q \cdot k_+/\tau) + \sum_i^n \exp(q \cdot k_-^i/\tau)}, \quad (14)$$

Inspired by Eq. 14 that multiple negative terms are involved, we can reformulate the preference distribution in Eq. 3 (in the main paper) as:

$$p_{\text{multi}}^* = p^*(y_c > Y_r | x) \quad (15)$$
$$= \frac{\exp(r^*(x, y_c))}{\exp(r^*(x, y_c)) + \sum_{y_r \in Y_r} \exp(r^*(x, y_r))}, \quad (16)$$

where one positive preference data is paired with multiple rejected samples that are represented by a union  $Y_r$ . In this case, the preference database changes to:

$$\mathcal{D}^{\text{multi}} = \{x^{(j)}, y_c^{(j)}, Y_r^{(j)}\}_{j=1}^{N_d}. \quad (17)$$

Note that in SeVa pipeline, this new preference database in Eq. 17 can be easily constructed (e.g., we can do data augmentation sampling across range of available ones to obtain more negatives for  $Y_c$ ). Now, by considering the closed form in of the reward function in Eq. 6 of the main paper and utilizing samples in Eq. 17 (to do maximum likelihood estimation), we derive a more general form of DPO as:

$$\mathcal{L}_{\text{dpo}}^{\text{multi}} = -\mathbb{E}_{\mathcal{D}^{\text{multi}}} \left[ \log \sigma \left( \beta \log \frac{\pi_{\theta'}(y_c|x)}{\pi_{\text{ref}}(y_c|x)} - \sum_{y_r \in Y_r} \beta \log \frac{\pi_{\theta'}(y_r|x)}{\pi_{\text{ref}}(y_r|x)} \right) \right], \quad (18)$$

and optimize it using pseudo-constructed database by our SeVa pipeline. At present, this generalized form is out of the scope of this paper. We will leave this as future work to explore more potentials of our SeVa.

## B DATA CONSTRUCTION DETAILS

In Sec. 4.1 of the main paper, we have discussed the data construction process. Here, we want to emphasize the *counting* of our data instance. Note that for clarity in all our experiment, we choose the num of the unfiltered preference sample as the DPO instances we used. But please note that the actual preference data sent to DPO are much less than that. One is the SeVa’s filtering mechanism as discussed before (the filtering process in main paper’s Alg. 1 almost cuts down the instance num by half). The other is the data counting difference between LLaVa and SeVa: an instance of multi-turn

dialogue will contribute to about 2 raw image-question pairs in our SeVa. As such, the data used in SeVa *can be* far less counted if we ‘regard’ this 2 image-question pairs as only one data instance that is sourced from a multi-dialogue.

## C MORE VISUALIZATIONS

### C.1 Data augmentations samples

In Fig. 9, we visualize the data augmentation samples to show how the negatives responses are obtained. We choose original image, random-flip (‘RandFlip’), random-resized-crop (‘RRCrop’), moco augmentations and diffusion noise for better visualizations. We highlight those incorrect or incomplete answers with red color.

### C.2 GPT-4 prompt template

Please refer to Fig. 8 for the GPT-4 prompt template we adopted to evaluate the consistency score in Table 5 of the main paper.

### C.3 More examples of SeVa

Please refer to Fig. 10-11. In Fig. 10, we showcase more examples of SeVa-13B to illustrate its multi-modal comprehension ability, including complex reasoning about a wedding, chain-of-thought power to make a drink and the capability to read scientific figures. In Fig. 11, we compare SeVa-13B with more VLMs, namely LLaVa-1.5-13B and Qwen-VL-chat. We found our model demonstrate a detailed and faithful answers, which is on par with (or even better than) Qwen-VL-chat that possibly requires more training data source and larger model capacity.

## REFERENCES

- [1] Anand Mishra, Shashank Shekhar, Ajeet Kumar Singh, and Anirban Chakraborty. 2019. Ocr-vqa: Visual question answering by reading text in images. In *2019 international conference on document analysis and recognition (ICDAR)*. IEEE, 947–952.
- [2] Amanpreet Singh, Vivek Natarajan, Meet Shah, Yu Jiang, Xinlei Chen, Dhruv Batra, Devi Parikh, and Marcus Rohrbach. 2019. Towards vqa models that can read. In *Proceedings of the IEEE/CVF conference on computer vision and pattern recognition*. 8317–8326.

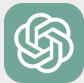

## ChatGPT for Consistency Evaluation

You are an AI assistant to help me identify the consistency of two set of answers generated by 2 Vision-Language models with different weights. The answers are generated according to the input image (invisible in your system), and an asked question (the 'prompt' dict in each question answer pair). The input to you are shown in the following format:

[task-specific input to the GPT]

### # Illustrations for input-specific information

The "prompt" value in the dict are the same questions asked to the two models (as mentioned before), while the 'text' value in each dict are the answers to Model1 and Model2, respectively. Now please help me evaluate two metrics, called "Question consistency of model1", ""Question consistency of model1"" and "consistency between model1 and model2" with an integer score from 1 to 10 (1 is the least consistency, and the 10 is the most consistent). Note that DO NOT writing any code to evaluate, but only evaluate your own, that is in your own system!

### # Illustrations for output-specific information

Here is the meaning of the three metrics

"A1, Question consistency of model1": the answered information ("text") of the model1 with regard to the asked questions ("prompt").

"A2, Question consistency of model2": the answered information ("text") of the model2 with regard to the asked questions ("prompt").

"A3, consistency between model1 and model2": The consistency of model2's answer compared with model1's answer. If the model2 outputs very different answers from model1, you should give this metric a relatively low score, and vise verse.

You should evaluate the consistency between the following 3 aspects:

1. wording: is the words used in the sentence consistency of not (score from 1-10, with 1 the least)
2. sentiment: is the sentiment conveyed consistent? (score from 1-10, with 1 the least)
3. content: is the overall content of facts consistent? (score from 1-10, with 1 the least)

Now I will show you one paired input, please output the metrics as follows

### # Requirements for output format

You need to figure out the [score] in the [OUTPUT] format. Also, print the SIMPLIFIED FORMAT as follows, and fill the correct number in the corresponding metrics.

### # Output examples

OUTPUT: [evaluation-specific output format]

SIMPLIFIED FORMAT:

A1,[wording],[content],[sentiment],[overall]

A2,[wording],[content],[sentiment],[overall]

A3,[wording],[content],[sentiment],[overall]

The INPUT Prompt is:

Prompt [Show your input to GPT for evaluation of consistency score]

Figure 8: Prompt template to evaluate the consistency score. The numerical results are shown in Table 4 of the main paper.

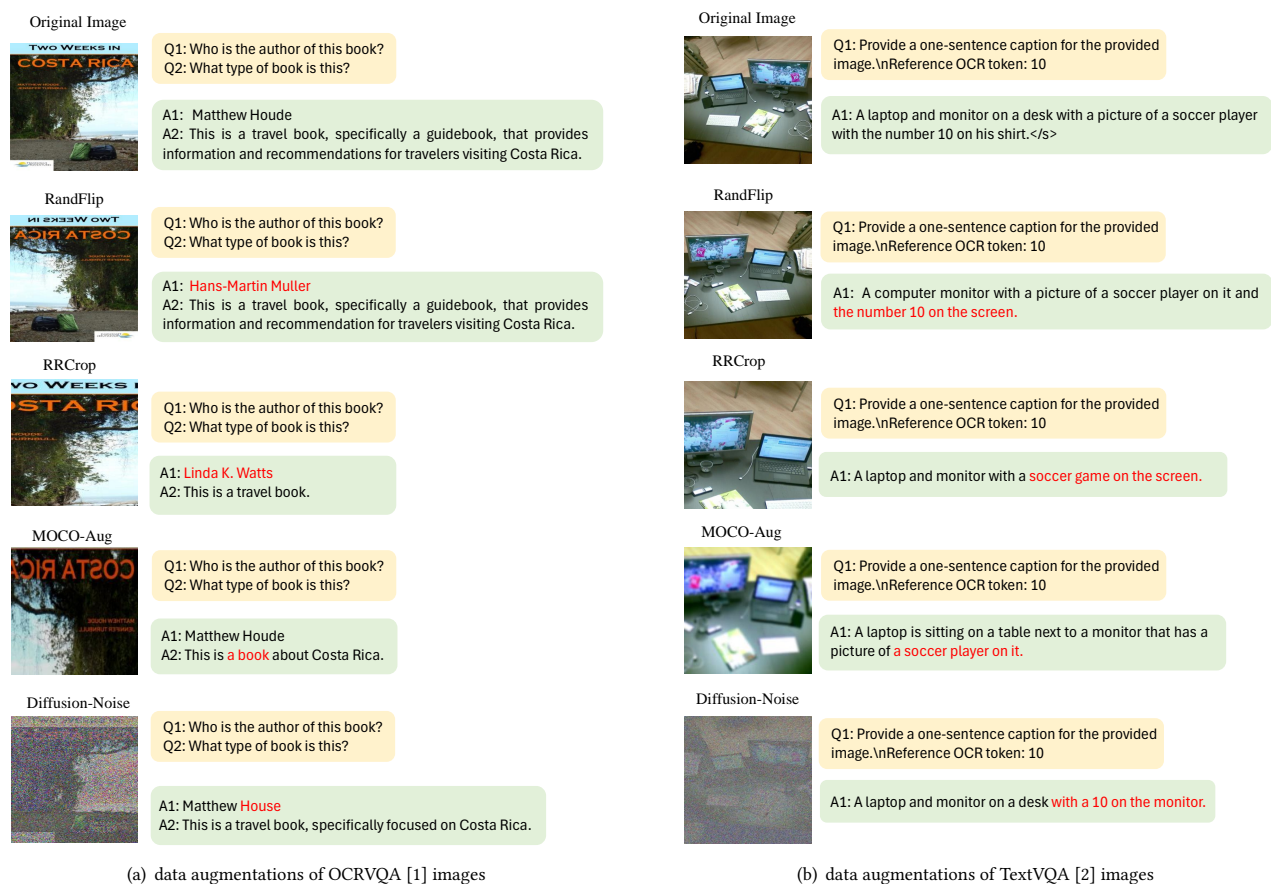

**Figure 9: Visualizations of the distorted images and their model answers. In-complete or in-correct tokens are highlighted with red colors.**

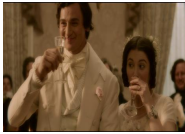

Q: Why are the man and woman in white so close to each other? Answer it and give the rationale.

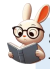

SeVa-13B:

The man and woman in white are close to each other because they are a bride and groom celebrating their wedding. In the image, the man is holding a glass of champagne and toasting, while the woman is also holding a glass of champagne and drinking. This scene represents a joyful moment during their wedding reception, where the couple is sharing a toast and enjoying each other's company. The close proximity of the couple symbolizes their unity, love, and commitment to each other as they embark on their new journey as husband and wife.

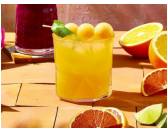

Q: How to make this?

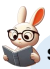

SeVa-13B:

To make this refreshing citrus drink with grapefruit balls and a sprig of mint, follow these steps:

1. Gather ingredients:
  - Fresh grapefruit: peel and segment the grapefruit to remove the bitter pith and membranes. You can use a grapefruit zester or a sharp knife to do this.
  - Fresh orange: peel the orange to remove the outer layer and segment it to remove the seeds and pith.
  - Lime: peel the lime and remove seeds.
  - Mint leaves: fresh or dried, for garnish
  - Simple syrup (optional): you can make your own or use store-bought
  - Ice
  - Glass: a clear glass or a glass with a stem, preferably with a base wide enough to hold the grapefruit balls
  - Toothpick or skewer
2. Prepare the grapefruit balls:
  - Combine the grapefruit segments, simple syrup (if using), and a squeeze of lime juice in a bowl.
  - Mix well and refrigerate for at least 30 minutes to allow the flavors to meld.
  - Form the grapefruit segments into balls using your hands or a small cookie scoop.
3. Assemble the drink:
  - Fill the glass with ice.
  - Add a few grapefruit balls to the glass.
  - Garnish the drink with a sprig of mint and a toothpick or skewer to hold it in place.
  - Pour the prepared grapefruit juice over the ice and grapefruit balls.
  - Squeeze a wedge of lime over the drink and drop it in to release the juice.
  - Stir gently and serve immediately.

This citrus drink is perfect for warm weather or as a refreshing treat during any time of the year. Enjoy!

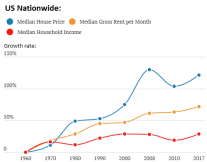

Q: Which year has the highest growth rate of median house price?

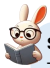

SeVa-13B:

The year with the highest growth rate of median house price is 2000, as indicated by the blue line on the chart. This suggests that during that time, there was a significant increase in the median house price, which could be attributed to various factors such as economic growth, low-interest rates, and increased demand for housing.

Figure 10: Visualizations of complex visual question answering with our SeVa-13B models.

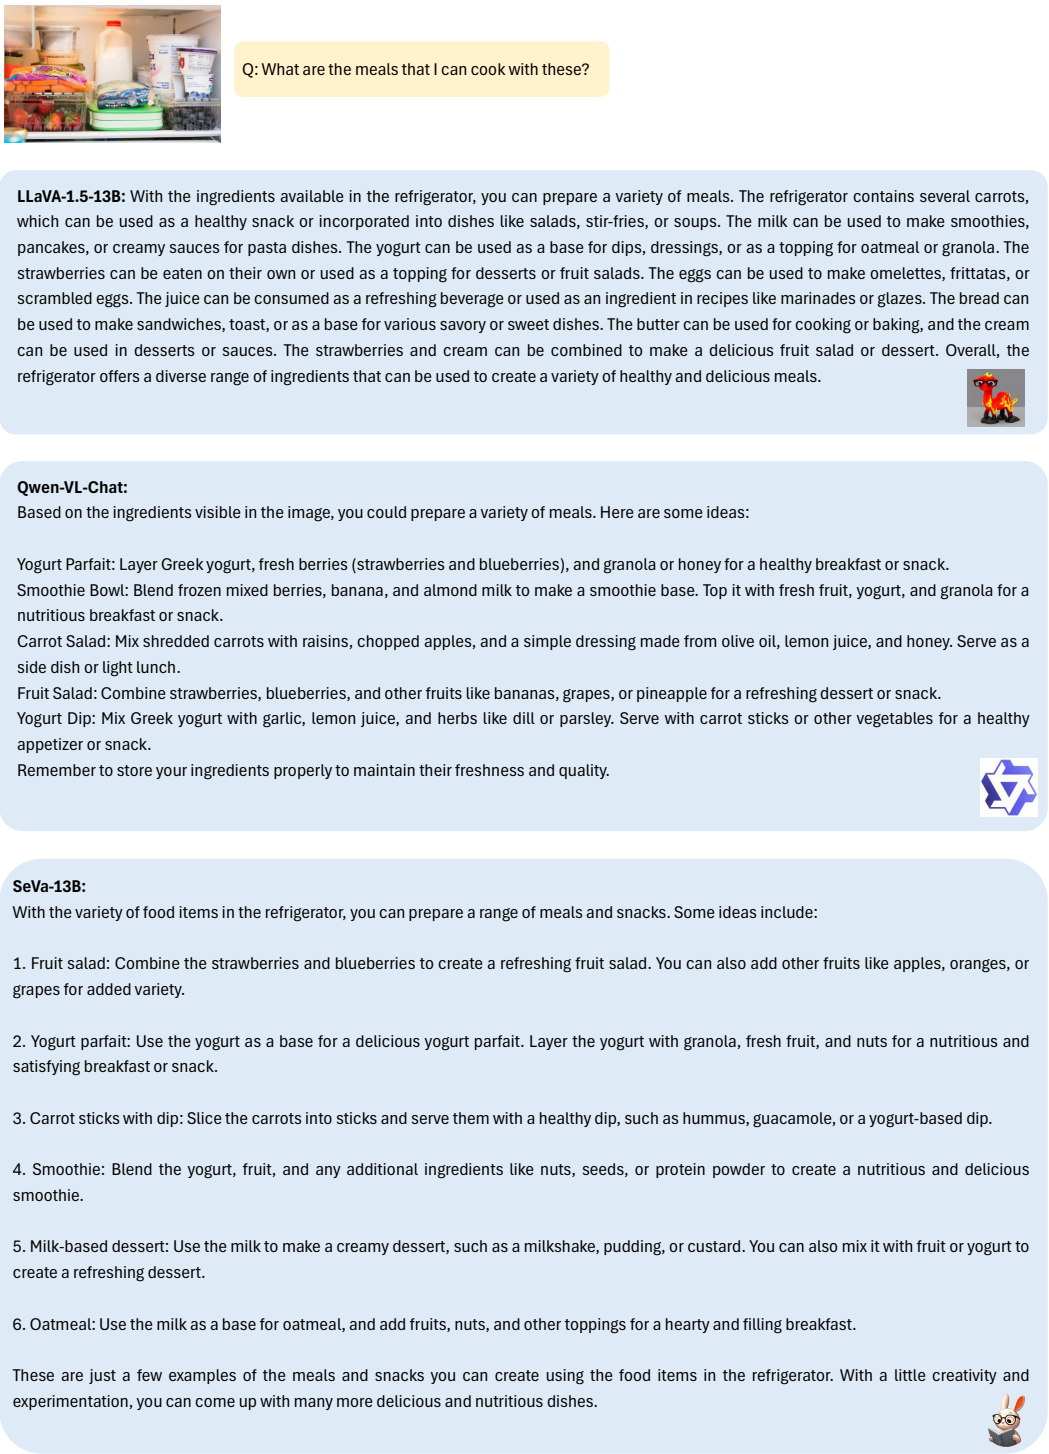

Figure 11: Comparison of our SeVa-13B with other VLMs (LLaVA-1.5, Qwen-VL-Chat).
